# Supplementary material for: Validation of a culturally adapted Swedish-language version of the Death Literacy Index
Source: PubMed Central journal article supplement (PMC10688853; doi:10.1371/journal.pone.0295141), 2023-11-30
Supplement: pone.0295141.s006.pdf [file pone.0295141.s006.pdf]

S6 Table. Inter-item correlation matrix of DLI-S items.

|         | 1     | 2     | 3     | 4     | 5     | 6     | 7     | 8     | 9     | 10    | 11    | 12    | 13    | 14    | 15    | 16    | 17    | 18    | 19    | 20    | 21    | 22    | 23    | 24    | 25    | 26    | 27    | 28    | 29 |
|---------|-------|-------|-------|-------|-------|-------|-------|-------|-------|-------|-------|-------|-------|-------|-------|-------|-------|-------|-------|-------|-------|-------|-------|-------|-------|-------|-------|-------|----|
| Item 1  | --    |       |       |       |       |       |       |       |       |       |       |       |       |       |       |       |       |       |       |       |       |       |       |       |       |       |       |       |    |
| Item 2  | .56** | --    |       |       |       |       |       |       |       |       |       |       |       |       |       |       |       |       |       |       |       |       |       |       |       |       |       |       |    |
| Item 3  | .53** | .47** | --    |       |       |       |       |       |       |       |       |       |       |       |       |       |       |       |       |       |       |       |       |       |       |       |       |       |    |
| Item 4  | .52** | .47** | .59** | --    |       |       |       |       |       |       |       |       |       |       |       |       |       |       |       |       |       |       |       |       |       |       |       |       |    |
| Item 5  | .31** | .26** | .30** | .42** | --    |       |       |       |       |       |       |       |       |       |       |       |       |       |       |       |       |       |       |       |       |       |       |       |    |
| Item 6  | .29** | .31** | .35** | .39** | .73** | --    |       |       |       |       |       |       |       |       |       |       |       |       |       |       |       |       |       |       |       |       |       |       |    |
| Item 7  | .18** | .20** | .15** | .31** | .56** | .56** | --    |       |       |       |       |       |       |       |       |       |       |       |       |       |       |       |       |       |       |       |       |       |    |
| Item 8  | .21** | .21** | .23** | .32** | .42** | .46** | .46** | --    |       |       |       |       |       |       |       |       |       |       |       |       |       |       |       |       |       |       |       |       |    |
| Item 9  | .45** | .37** | .56** | .45** | .34** | .34** | .22** | .24** | --    |       |       |       |       |       |       |       |       |       |       |       |       |       |       |       |       |       |       |       |    |
| Item 10 | .34** | .22** | .35** | .34** | .29** | .26** | .17** | .17** | .51** | --    |       |       |       |       |       |       |       |       |       |       |       |       |       |       |       |       |       |       |    |
| Item 11 | .35** | .27** | .42** | .38** | .26** | .28** | .18** | .16** | .63** | .69** | --    |       |       |       |       |       |       |       |       |       |       |       |       |       |       |       |       |       |    |
| Item 12 | .27** | .18** | .26** | .29** | .17** | .17** | .16** | .13** | .42** | .53** | .62** | --    |       |       |       |       |       |       |       |       |       |       |       |       |       |       |       |       |    |
| Item 13 | .44** | .35** | .45** | .46** | .29** | .31** | .20** | .23** | .63** | .50** | .59** | .55** | --    |       |       |       |       |       |       |       |       |       |       |       |       |       |       |       |    |
| Item 14 | .21** | .22** | .32** | .36** | .24** | .29** | .14** | .33** | .32** | .24** | .27** | .24** | .35** | --    |       |       |       |       |       |       |       |       |       |       |       |       |       |       |    |
| Item 15 | .25** | .23** | .27** | .28** | .18** | .23** | .17** | .15** | .23** | .11*  | .17** | .15** | .30** | .44** | --    |       |       |       |       |       |       |       |       |       |       |       |       |       |    |
| Item 16 | .26** | .23** | .34** | .43** | .35** | .45** | .28** | .41** | .35** | .26** | .28** | .24** | .41** | .62** | .47** | --    |       |       |       |       |       |       |       |       |       |       |       |       |    |
| Item 17 | .27** | .24** | .41** | .41** | .20** | .28** | .11*  | .17** | .34** | .23** | .25** | .19** | .37** | .44** | .43** | .49** | --    |       |       |       |       |       |       |       |       |       |       |       |    |
| Item 18 | .16** | .19** | .28** | .35** | .23** | .32** | .16** | .30** | .30** | .21** | .23** | .21** | .30** | .61** | .39** | .69** | .46** | --    |       |       |       |       |       |       |       |       |       |       |    |
| Item 19 | .24** | .25** | .32** | .41** | .30** | .33** | .25** | .46** | .32** | .20** | .21** | .18** | .36** | .57** | .39** | .72** | .50** | .66** | --    |       |       |       |       |       |       |       |       |       |    |
| Item 20 | .21** | .24** | .39** | .42** | .24** | .27** | .13** | .24** | .37** | .23** | .26** | .23** | .38** | .52** | .36** | .54** | .71** | .57** | .61** | --    |       |       |       |       |       |       |       |       |    |
| Item 21 | .15** | .20** | .29** | .33** | .26** | .29** | .19** | .28** | .33** | .17** | .23** | .16** | .30** | .56** | .34** | .56** | .42** | .65** | .55** | .53** | --    |       |       |       |       |       |       |       |    |
| Item 22 | .15** | .13** | .28** | .34** | .36** | .42** | .25** | .29** | .34** | .27** | .27** | .22** | .36** | .54** | .34** | .69** | .45** | .71** | .58** | .53** | .68** | --    |       |       |       |       |       |       |    |
| Item 23 | .15** | .15** | .25** | .32** | .33** | .39** | .23** | .26** | .30** | .20** | .25** | .13** | .30** | .51** | .35** | .64** | .47** | .65** | .54** | .50** | .67** | .82** | --    |       |       |       |       |       |    |
| Item 24 | .09*  | .10*  | .22** | .28** | .26** | .32** | .23** | .25** | .32** | .17** | .22** | .15** | .25** | .49** | .29** | .53** | .38** | .53** | .48** | .48** | .66** | .69** | .66** | --    |       |       |       |       |    |
| Item 25 | .19** | .21** | .29** | .36** | .29** | .31** | .24** | .23** | .39** | .26** | .31** | .23** | .38** | .52** | .32** | .58** | .42** | .61** | .54** | .51** | .72** | .70** | .68** | .71** | --    |       |       |       |    |
| Item 26 | .24** | .21** | .25** | .34** | .32** | .34** | .26** | .37** | .28** | .23** | .25** | .23** | .34** | .44** | .35** | .50** | .32** | .45** | .47** | .35** | .47** | .50** | .47** | .45** | .50** | --    |       |       |    |
| Item 27 | .24** | .22** | .24** | .35** | .32** | .33** | .25** | .34** | .30** | .23** | .27** | .23** | .33** | .50** | .33** | .52** | .35** | .51** | .49** | .41** | .59** | .56** | .56** | .54** | .61** | .84** | --    |       |    |
| Item 28 | .26** | .23** | .31** | .39** | .28** | .32** | .22** | .33** | .36** | .28** | .28** | .25** | .38** | .50** | .34** | .54** | .37** | .56** | .54** | .45** | .57** | .59** | .55** | .54** | .60** | .74** | .81** | --    |    |
| Item 29 | .28** | .23** | .27** | .34** | .26** | .30** | .21** | .32** | .29** | .24** | .27** | .21** | .34** | .47** | .31** | .46** | .36** | .44** | .43** | .43** | .52** | .50** | .48** | .42** | .56** | .71** | .70** | .68** | -- |

\*\* . Correlation is significant at the 0.01 level (2-tailed).

\* . Correlation is significant at the 0.05 level (2-tailed).
