# Supplementary material for: Validation of a culturally adapted Swedish-language version of the Death Literacy Index
Source: PubMed Central journal article supplement (PMC10688853; doi:10.1371/journal.pone.0295141), 2023-11-30
Supplement: pone.0295141.s007.pdf [file pone.0295141.s007.pdf]

# PLOS ONE

## Validation of a culturally adapted Swedish-language version of the Death Literacy Index --Manuscript Draft--

|                                |                                                                                                                                                                                                                                                                                                                                                                                                                                                                                                                                                                                                                                                                                                                                                                                                                                                                                                                                                                                                                                                                                                                                                                                                                                                                                                                                                                                                                                                                                                                                                                                                                                                                                                                                                                                                                                                                                                                                                                                                                                                                                                                    |
|--------------------------------|--------------------------------------------------------------------------------------------------------------------------------------------------------------------------------------------------------------------------------------------------------------------------------------------------------------------------------------------------------------------------------------------------------------------------------------------------------------------------------------------------------------------------------------------------------------------------------------------------------------------------------------------------------------------------------------------------------------------------------------------------------------------------------------------------------------------------------------------------------------------------------------------------------------------------------------------------------------------------------------------------------------------------------------------------------------------------------------------------------------------------------------------------------------------------------------------------------------------------------------------------------------------------------------------------------------------------------------------------------------------------------------------------------------------------------------------------------------------------------------------------------------------------------------------------------------------------------------------------------------------------------------------------------------------------------------------------------------------------------------------------------------------------------------------------------------------------------------------------------------------------------------------------------------------------------------------------------------------------------------------------------------------------------------------------------------------------------------------------------------------|
| <b>Manuscript Number:</b>      | PONE-D-22-01686                                                                                                                                                                                                                                                                                                                                                                                                                                                                                                                                                                                                                                                                                                                                                                                                                                                                                                                                                                                                                                                                                                                                                                                                                                                                                                                                                                                                                                                                                                                                                                                                                                                                                                                                                                                                                                                                                                                                                                                                                                                                                                    |
| <b>Article Type:</b>           | Research Article                                                                                                                                                                                                                                                                                                                                                                                                                                                                                                                                                                                                                                                                                                                                                                                                                                                                                                                                                                                                                                                                                                                                                                                                                                                                                                                                                                                                                                                                                                                                                                                                                                                                                                                                                                                                                                                                                                                                                                                                                                                                                                   |
| <b>Full Title:</b>             | Validation of a culturally adapted Swedish-language version of the Death Literacy Index                                                                                                                                                                                                                                                                                                                                                                                                                                                                                                                                                                                                                                                                                                                                                                                                                                                                                                                                                                                                                                                                                                                                                                                                                                                                                                                                                                                                                                                                                                                                                                                                                                                                                                                                                                                                                                                                                                                                                                                                                            |
| <b>Short Title:</b>            | Validation of the Swedish-language version of the Death Literacy Index                                                                                                                                                                                                                                                                                                                                                                                                                                                                                                                                                                                                                                                                                                                                                                                                                                                                                                                                                                                                                                                                                                                                                                                                                                                                                                                                                                                                                                                                                                                                                                                                                                                                                                                                                                                                                                                                                                                                                                                                                                             |
| <b>Corresponding Author:</b>   | Therese Johansson, MSc.<br>Karolinska Institutet<br>Huddinge, Stockholm SWEDEN                                                                                                                                                                                                                                                                                                                                                                                                                                                                                                                                                                                                                                                                                                                                                                                                                                                                                                                                                                                                                                                                                                                                                                                                                                                                                                                                                                                                                                                                                                                                                                                                                                                                                                                                                                                                                                                                                                                                                                                                                                     |
| <b>Keywords:</b>               | Instrument development; public health; Questionnaire Surveys; Reliability and Validity; Death education; end-of-life care                                                                                                                                                                                                                                                                                                                                                                                                                                                                                                                                                                                                                                                                                                                                                                                                                                                                                                                                                                                                                                                                                                                                                                                                                                                                                                                                                                                                                                                                                                                                                                                                                                                                                                                                                                                                                                                                                                                                                                                          |
| <b>Abstract:</b>               | <p>The death literacy index (DLI) was developed in Australia to measure death literacy, a set of experience-based knowledge needed to understand and act on end-of-life (EOL) care options but has not yet been validated outside its original context. The aim of this study was to develop a culturally adapted Swedish-language version of the DLI, the DLI-S, and assess sources of evidence for its validity in a Swedish context. The study involved a multi-step process of translation and cultural adaptation and two validation phases: examining first content and response process validity through expert review ( n =10) and cognitive interviews ( n =10); and second, internal structure validity of DLI-S data collected from an online cross-sectional survey ( n =503). The psychometric evaluation involved analysis of descriptive statistics on item and scale-level, internal consistency and test-retest reliability, and confirmatory factor analysis. During translation and adaptation, changes were made to adjust items to the Swedish context. Additional adjustments were made following findings from the expert review and cognitive interviews. The content validity index exceeded recommended thresholds. The psychometric evaluation provided support for DLI-S' validity. The hypothesized six-factor model showed good fit. High internal consistency reliability was demonstrated for the overall scale (Cronbach's <math>\alpha</math> = 0.94) and each sub-scale ( <math>\alpha</math> 0.81–0.93). Test-retest reliability was acceptable, ICC ranging between 0.66–0.85. Through a comprehensive assessment of several sources of evidence, we show that the DLI-S demonstrates satisfactory validity and acceptability to measure death literacy in the Swedish context. There are, however, indications that the sub-scales measuring community capacity perform worse in comparison to other scales and may function differently in Sweden than in the original context. The DLI-S has potential to contribute to research on community-based EOL interventions.</p> |
| <b>Order of Authors:</b>       | Therese Johansson, MSc.<br>Åsa Olsson, MSc., RN<br>Carol Tishelman, PhD, RN<br>Kerrie Noonan, BA(Psych), MPsych(Clinical), PhD<br>Rosemary Leonard, PhD, BA<br>Lars E. Eriksson, PhD, RN<br>Ida Goliath, PhD, RN<br>Joachim Cohen, PhD, MSc.                                                                                                                                                                                                                                                                                                                                                                                                                                                                                                                                                                                                                                                                                                                                                                                                                                                                                                                                                                                                                                                                                                                                                                                                                                                                                                                                                                                                                                                                                                                                                                                                                                                                                                                                                                                                                                                                       |
| <b>Additional Information:</b> |                                                                                                                                                                                                                                                                                                                                                                                                                                                                                                                                                                                                                                                                                                                                                                                                                                                                                                                                                                                                                                                                                                                                                                                                                                                                                                                                                                                                                                                                                                                                                                                                                                                                                                                                                                                                                                                                                                                                                                                                                                                                                                                    |
| <b>Question</b>                | <b>Response</b>                                                                                                                                                                                                                                                                                                                                                                                                                                                                                                                                                                                                                                                                                                                                                                                                                                                                                                                                                                                                                                                                                                                                                                                                                                                                                                                                                                                                                                                                                                                                                                                                                                                                                                                                                                                                                                                                                                                                                                                                                                                                                                    |
| <b>Financial Disclosure</b>    | This study was funded by Strategic Research Area Health Care Science (SFO-V), Karolinska Institutet; the Doctoral School in Health Care Sciences, Karolinska Institutet;                                                                                                                                                                                                                                                                                                                                                                                                                                                                                                                                                                                                                                                                                                                                                                                                                                                                                                                                                                                                                                                                                                                                                                                                                                                                                                                                                                                                                                                                                                                                                                                                                                                                                                                                                                                                                                                                                                                                           |

Enter a financial disclosure statement that describes the sources of funding for the work included in this submission. Review the [submission guidelines](#) for detailed requirements. View published research articles from [PLOS ONE](#) for specific examples.

This statement is required for submission and **will appear in the published article** if the submission is accepted. Please make sure it is accurate.

#### Unfunded studies

Enter: *The author(s) received no specific funding for this work.*

#### Funded studies

Enter a statement with the following details:

- Initials of the authors who received each award
- Grant numbers awarded to each author
- The full name of each funder
- URL of each funder website
- Did the sponsors or funders play any role in the study design, data collection and analysis, decision to publish, or preparation of the manuscript?
- **NO** - Include this sentence at the end of your statement: *The funders had no role in study design, data collection and analysis, decision to publish, or preparation of the manuscript.*
- **YES** - Specify the role(s) played.

\* typeset

#### Competing Interests

Use the instructions below to enter a competing interest statement for this submission. On behalf of all authors, disclose any [competing interests](#) that could be perceived to bias this work—acknowledging all financial support and any other relevant financial or non-financial competing interests.

This statement is **required** for submission and **will appear in the published article** if the submission is accepted. Please make

Swedish Research Council for Health, Welfare and Working Life (FORTE); Stockholm City Elder Care Bureau; and Stockholm Gerontology Research Center. The funders had no part in, nor influence on, the study design, data collection, analysis, interpretation, or writing of results.

The authors have declared that no competing interests exist.

sure it is accurate and that any funding sources listed in your Funding Information later in the submission form are also declared in your Financial Disclosure statement.

View published research articles from [PLOS ONE](#) for specific examples.

**NO authors have competing interests**

Enter: *The authors have declared that no competing interests exist.*

**Authors with competing interests**

Enter competing interest details beginning with this statement:

*I have read the journal's policy and the authors of this manuscript have the following competing interests: [insert competing interests here]*

\* typeset

**Ethics Statement**

Enter an ethics statement for this submission. This statement is required if the study involved:

- Human participants
- Human specimens or tissue
- Vertebrate animals or cephalopods
- Vertebrate embryos or tissues
- Field research

Write "N/A" if the submission does not require an ethics statement.

General guidance is provided below. Consult the [submission guidelines](#) for detailed instructions. **Make sure that all information entered here is included in the Methods section of the manuscript.**

The study was approved by the Swedish Ethics Review Authority (reference number 2021-00915). All participants provided written informed consent, except participants in the cognitive interviews who provided oral informed consent.

**Format for specific study types**

**Human Subject Research (involving human participants and/or tissue)**

- Give the name of the institutional review board or ethics committee that approved the study
- Include the approval number and/or a statement indicating approval of this research
- Indicate the form of consent obtained (written/oral) or the reason that consent was not obtained (e.g. the data were analyzed anonymously)

**Animal Research (involving vertebrate animals, embryos or tissues)**

- Provide the name of the Institutional Animal Care and Use Committee (IACUC) or other relevant ethics board that reviewed the study protocol, and indicate whether they approved this research or granted a formal waiver of ethical approval
- Include an approval number if one was obtained
- If the study involved *non-human primates*, add *additional details* about animal welfare and steps taken to ameliorate suffering
- If anesthesia, euthanasia, or any kind of animal sacrifice is part of the study, include briefly which substances and/or methods were applied

**Field Research**

Include the following details if this study involves the collection of plant, animal, or other materials from a natural setting:

- Field permit number
- Name of the institution or relevant body that granted permission

**Data Availability**

Authors are required to make all data underlying the findings described fully available, without restriction, and from the time of publication. PLOS allows rare exceptions to address legal and ethical concerns. See the [PLOS Data Policy](#) and [FAQ](#) for detailed information.

No - some restrictions will apply

A Data Availability Statement describing where the data can be found is required at submission. Your answers to this question constitute the Data Availability Statement and **will be published in the article**, if accepted.

**Important:** Stating 'data available on request from the author' is not sufficient. If your data are only available upon request, select 'No' for the first question and explain your exceptional situation in the text box.

Do the authors confirm that all data underlying the findings described in their manuscript are fully available without restriction?

**Describe where the data may be found in full sentences. If you are copying our sample text, replace any instances of XXX with the appropriate details.**

- If the data are **held or will be held in a public repository**, include URLs, accession numbers or DOIs. If this information will only be available after acceptance, indicate this by ticking the box below. For example: *All XXX files are available from the XXX database (accession number(s) XXX, XXX).*
- If the data are all contained **within the manuscript and/or Supporting Information files**, enter the following: *All relevant data are within the manuscript and its Supporting Information files.*
- If neither of these applies but you are able to provide **details of access elsewhere**, with or without limitations, please do so. For example:

*Data cannot be shared publicly because of [XXX]. Data are available from the XXX Institutional Data Access / Ethics Committee (contact via XXX) for researchers who meet the criteria for access to confidential data.*

*The data underlying the results presented in the study are available from (include the name of the third party*

Data cannot be deposited in a public repository because informed consent to deposit individual data was not obtained. Data are available on request from: Head of archives, Department of Neurobiology, Care Sciences and Society, Alfred Nobels Allé 23, Karolinska Institutet, SE-141 83 Huddinge, Sweden.

*and contact information or URL).*

- This text is appropriate if the data are owned by a third party and authors do not have permission to share the data.

\* typeset

Additional data availability information:



## 25 Abstract

26 The death literacy index (DLI) was developed in Australia to measure death literacy, a set of  
27 experience-based knowledge needed to understand and act on end-of-life (EOL) care options but has  
28 not yet been validated outside its original context. The aim of this study was to develop a culturally  
29 adapted Swedish-language version of the DLI, the DLI-S, and assess sources of evidence for its validity  
30 in a Swedish context.

31 The study involved a multi-step process of translation and cultural adaptation and two validation  
32 phases: examining first content and response process validity through expert review ( $n=10$ ) and  
33 cognitive interviews ( $n=10$ ); and second, internal structure validity of DLI-S data collected from an  
34 online cross-sectional survey ( $n=503$ ). The psychometric evaluation involved analysis of descriptive  
35 statistics on item and scale-level, internal consistency and test-retest reliability, and confirmatory  
36 factor analysis.

37 During translation and adaptation, changes were made to adjust items to the Swedish context.

38 Additional adjustments were made following findings from the expert review and cognitive  
39 interviews. The content validity index exceeded recommended thresholds. The psychometric  
40 evaluation provided support for DLI-S' validity. The hypothesized six-factor model showed good fit.

41 High internal consistency reliability was demonstrated for the overall scale (Cronbach's  $\alpha=0.94$ ) and  
42 each sub-scale ( $\alpha$  0.81–0.93). Test-retest reliability was acceptable, ICC ranging between 0.66–0.85.

43 Through a comprehensive assessment of several sources of evidence, we show that the DLI-S  
44 demonstrates satisfactory validity and acceptability to measure death literacy in the Swedish context.

45 There are, however, indications that the sub-scales measuring community capacity perform worse in  
46 comparison to other scales and may function differently in Sweden than in the original context. The  
47 DLI-S has potential to contribute to research on community-based EOL interventions.



48 Keywords

49 *Instrument development; Public Health; Questionnaire Surveys; Reliability and Validity; Death*

50 *education; End-of-Life Care*

51

## 52 Introduction and aim

53 Just as health literacy relates to the extent to which people can find, interpret, and use health  
54 information and services [1], death literacy (DL) is a newly-coined term denoting knowledge and skills  
55 needed to understand and act on options for end-of-life (EOL) and death care [2]. Building on new  
56 public health approaches that highlight individual and community capacity-building and  
57 empowerment to handle issues of dying, death, and loss [3], DL is theorized to develop from  
58 engaging with EOL care and learning from those experiences [4].

59 The *death literacy index* (DLI), an instrumentalization of DL, is a questionnaire developed from  
60 research in Australia about people's experiences of EOL care [5]. DLI is intended to measure  
61 population levels of DL and evaluate EOL-related educational initiatives [2]. As such, the DLI may  
62 constitute a promising tool for appraising impact of health promoting activities in relation to EOL  
63 issues. However, as the DLI has only been used to date among adults in the Australian general public,  
64 the extent to which DL and its operationalization are comparable across cultures is unknown. While  
65 the DLI has demonstrated high convergent validity and reliability in Australia [2, 6], it has not yet  
66 been translated into or validated in other languages or outside the Australian context. The aim of this  
67 study was to develop and culturally adapt Swedish-language version of the DLI (DLI-S) and assess its  
68 validity in a Swedish context.

## 69 Materials and methods

### 70 Study design

71 As illustrated in Figure 1, this instrument validation study used a multi-step mixed methods approach  
72 comprising three phases, to translate and culturally adapt the Death Literacy Index (DLI) into Swedish  
73 and to assess the validity of the resulting DLI-S.

74

75

76 **Fig 1. Schematic of the study process.**

- 77  Steps in the translation and adaptation of the DLI-S
-  Sources of validity evidence

78 **The Death Literacy Index** 

79 The DLI is a multi-dimensional instrument containing 29 items distributed over four dimensions of  
80 DL; *Practical knowing* (n of items=8), *Learning from Experience* (n=5), *Factual knowledge* (n=7), and  
81 *Community capacity* (n=9) [2]. The dimensions are represented in the DLI as four scales, two of which  
82 contain sub-scales capturing specific dimensional facets; *Practical knowing* has the sub-scales *Talking*  
83 *support* (n=4) and *Hands-on care* (n=4), whereas *Community Capacity* has the sub-scales *Accessing*  
84 *help* (n=5) and *Community support groups* (n=4). DLI items are in the form of statements with  
85 ordered category responses on a 5-point Likert-type scale, usually ranging from “do not agree at all”  
86 and “strongly agree”. Since the DLI covers various aspects of DL, scores are calculated for each scale  
87 and sub-scale, using transformed mean scores. Total DL is calculated as a higher-order composite  
88 score, which is said to reflect overall capacity gained from previous experiences [6]. The original DLI  
89 and items in the DLI-S are presented in S1 and S2 Files respectively.

90 **Translation and adaptation of the Swedish Death Literacy Index**

91 After obtaining permission to translate the DLI from the original developers, co-authors RL and KN,  
92 the DLI-S was developed following Beaton et al.’s [7] recommendations for instrument translation  
93 and cross-cultural adaptation. The 29 items with corresponding instructions and response categories  
94 were independently translated from English to Swedish by co-authors TJ and ÅO, both native  
95 Swedish speakers proficient in English. The two initial forward translations were compared to identify  
96 discrepancies and discuss ambiguous wordings, resulting in a joint draft [7]. This DLI-S draft was sent  
97 to the members of a multidisciplinary research group with both native English and Swedish speakers,  
98 who individually reviewed the draft, prior to continued revision through a process of negotiated  
99 consensus in a series of meetings [8] after which changes to content were decided so that the

100 Swedish items would convey the same conceptual understanding as the original instrument [7, 9].  
101 Back translation was not used in this study as it has been criticized for missing variation in linguistic  
102 meaning and cultural nuances [10].

### 103 Instrument validation

104 Validity is defined as a unitary concept assessed from several sources of evidence, each contributing  
105 to the overall validity of an instrument [11]. Validation involves the assessment of evidence to  
106 support interpretations of scores in relation to the intended use of an instrument [12]. Validity is  
107 context-specific, and thus, validation is strongly recommended whenever an instrument is to be used  
108 in a new, qualitatively different, population or context [13]. In this article we focus on three sources  
109 of validity evidence: 1) *Evidence based on content*, relating to the adequacy and relevance of items to  
110 represent and score the construct measured [14]; 2) *Evidence based on response processes*, which  
111 involves exploration of respondents' actions and cognitive processes to identify possible sources of  
112 error, e.g., challenges with interpreting and answering items [11]; and 3) *Evidence based on internal*  
113 *structure*, which concerns how items relate to each other and to the overarching construct, often  
114 measured as reliability across items, time, or respondents [14].

### 115 Phase 1. Validity evidence based on content and response process

#### 116 1.1 Expert panel review

##### 117 *Procedure and participants*

118 An expert review was conducted to evaluate the validity of DLI-S items to measure DL [15]. Since DLI  
119 targets the general population, there is no delimited area of expertise relevant for this step. We  
120 therefore made efforts to recruit ten panel members with varying ages, backgrounds, and personal  
121 and professional perspectives in relation to the EOL, e.g., palliative care, gerontology, ethnology,  
122 professional translation, clinical nursing, and from patient interest organizations. Email invitations  
123 were sent with information about the study purpose and methods. Inclusion criteria were proficiency  
124 in both Swedish and English. Each panel member reviewed the DLI-S independently, using an online

125 survey, accessible only after providing informed consent. Following recommendations by Grant and  
126 Davis (15), panel members were first provided with a summary description of the conceptual DL  
127 model and provided with information about the intended use of the DLI. As shown in S3 File, the  
128 review comprised two main sections: *Translation review*, in which the semantic and cultural  
129 equivalence between each Swedish item and the original corresponding English-language item was  
130 assessed on a four-point scale; and *Content validity assessment*, in which the DLI-S items' relevance  
131 and clarity of content were rated on a four-point scale. Panel members could comment and suggest  
132 changes for every item throughout both sections of the survey.

### 133 *Data analysis*

134 Comments related to the translation and content of each item were reviewed and summarized by TJ.  
135 Quantitative ratings were collated in a matrix in Microsoft Excel to calculate the content validity  
136 index (CVI), i.e., inter-rater agreement at the item-level (I-CVI) and scale-level (S-CVI). I-CVI  
137 represents the proportion of panel members rating an item positively (e.g., 3 or 4) and is  
138 recommended to be at least 0.78 [16]. S-CVI was calculated using average proportion, recommended  
139 for panels of  $\geq 8$  [17].

## 140 1.2 Pre-testing using cognitive interviews

### 141 *Procedure and participants*

142 To determine whether the DLI-S items were acceptable, comprehensible, and able to generate  
143 information as intended, authors TJ and ÅO conducted cognitive interviews with a new sample from  
144 the target population [18], i.e., adults from the general public. Interviews combined think-aloud  
145 technique, in which the respondent describes their reasoning out loud as they read and respond to  
146 each item [19], and verbal probing, whereby the interviewer asks questions to clarify and further  
147 explore any issues [20]. Participants were recruited through convenience sampling in the  
148 researchers' networks, striving for variation in terms of age, gender, educational level, and  
149 professional background. Due to the Covid-19 pandemic, interviews were conducted online using

150 Zoom. All participants received written information about the study in advance and consented orally  
151 to participate in audio-recorded interviews. While we assessed the risk of harm to participants as  
152 low, the interviewers were experienced in handling emotional reactions and could refer participants  
153 to other sources for support if needed.

#### 154 *Data analysis*

155 Data were based on the interviewers' field notes, using audio-recordings as back-up if needed, and  
156 compiled into a summary matrix, linking comments to the items and sub-scales to which they  
157 referred [21]. The matrix was reviewed in recurring consensus meetings to inform decisions  
158 regarding item retention, revision, or deletion and modifications to instructions or response  
159 categories.

#### 160 1.3 Literacy review

161 To investigate linguistic accessibility, the lexical profile of the DLI-S was reviewed by an independent  
162 consultant using the software *AntWordProfiler* to examine the proportion of words among the 5,000  
163 most common in Swedish. This was done on two occasions: after the first 5 cognitive interviews and  
164 again after the DLI-S had been finalized (Figure 1).

### 165 Phase 2. Validity evidence based on internal structure

#### 166 Procedure and participants

167 Data was collected from September–November 2021 through an online survey administered by an  
168 external data collection agency with a pre-existing panel of ca 100,000 Swedish adults willing to  
169 partake in surveys on various topics. Since this study aimed for theoretical generalization rather than  
170 making statistical inferences regarding population estimates of death literacy, a representative  
171 probability sample was not necessary [22]. Still, we strove for a sample reflective of the  
172 heterogeneity within the Swedish population. Survey invitations were sent to a quota sample  
173 ( $n=2991$ ), stratified by gender, age, and region, from the agency's existing panel. The minimum  
174 sample size was set to 500 to have sufficient data and power for confirmatory factor analysis (CFA)

175 [23]. The survey comprised the DLI-S items and questions about sociodemographic variables and EOL  
176 experiences and was only accessible to panel members who agreed to participate after being  
177 informed about the study. Participants were notified that they could exit the survey at any time and  
178 were provided with the researchers' contact information in case they needed support or had  
179 questions or comments following participation. At the end of the survey, participants were asked  
180 whether they were willing to complete the survey a second time, to assess test-retest reliability. Of  
181 the 412 that agreed to participate in a follow-up, 82 were re-invited to the survey. The retest sample  
182 size was set to minimum 50 to provide sufficient for calculating intra-class correlation coefficients  
183 (ICC) [24]. The time interval was set to approximately 4 weeks, chosen to allow enough time to avoid  
184 rehearsal effects but short enough to minimize the risk of participants experiencing real change that  
185 might alter their responses [25].

#### 186 Data analysis

187 Statistical analyses were conducted using IBM SPSS Statistics 28 and the *lavaan* package [26] in R  
188 (version 4.1.1). Descriptive statistics were used to explore socio-demographic characteristics of the  
189 sample and analyze central tendencies and dispersion on item- and scale-level. Response variation  
190 was examined at item-level by investigating if all five response categories were used and at scale-  
191 level by identifying whether there were floor or ceiling effects, i.e.,  $\geq 15\%$  of responses in the  
192 maximum and/or minimum category [27]. Inter-item correlations were calculated for all items.  
193 Corrected item-total correlations were examined and values between 0.2–0.7 were considered good  
194 discrimination within a scale [28]. Internal consistency reliability was assessed by calculating  
195 Cronbach's  $\alpha$  coefficients and confidence intervals of items, sub-scales and the full DLI. Values  $\geq 0.8$   
196 were considered as demonstrating good reliability [29]. However, since the appropriateness of  
197 Cronbach's  $\alpha$  as a sole measure of reliability has been questioned, due to the effects of the number  
198 of scale items and assumptions of unidimensionality and tau equivalence [30, 31], we also calculated  
199 average inter-item correlation (AIC), a more robust indicator of internal consistency [32]. The  
200 acceptable range for AIC is considered to be 0.15–0.5 [29]. ICC was calculated to assess scale test-

201 retest reliability, using the two-way mixed effects, single measure model (ICC type 3,1). ICC >0.9  
202 indicates excellent reliability, whereas ICC >0.75 is considered good, >0.5 is moderate and <0.5  
203 suggests poor reliability [33].

204 CFA was used to assess the fitness of the DLI factor structure. Three factor models were tested: with  
205 DLI treated as one universal factor; as four factors (corresponding to the original main DL  
206 dimensions); and as six factors (corresponding to four sub-scales (1.1, 1.2, 4.1, 4.2) and two  
207 dimension scales (2 and 3). As the 5-point response range used in the DLI was relatively short, data  
208 were modelled as ordinal rather than continuous. Diagonally weighted least squares (DWLS) were  
209 used as model estimator, since this has been shown to perform better than robust maximum  
210 likelihood estimation with ordinal data [34]. Tucker-Lewis index (TLI) and Comparative Fit Index (CFI)  
211 >0.95, root mean square error of approximation (RMSEA) >0.06, Standardized Root Mean Square  
212 Residual (SRMR) >.08, and  $\chi^2$  *p* value >.05 were used as indices of good model fit [35].

### 213 [Ethical considerations of the study](#)

214 The study process described below was approved by the Swedish Ethics Review Authority (reference  
215 number 2021-00915) and conducted according to the ethical principles of the Helsinki Declaration  
216 [36]. All study participants received written information about the nature of the study, including its  
217 subject, purpose, and procedure, as well as their right to withdraw. Informed consent to participate  
218 was obtained from all participants. The DLI asks about experiences related to the EOL, a potentially  
219 sensitive topic. However, previous research has shown that questions addressing dying or death may  
220 have an effect on immediate mood but unlikely to cause harm [37]. Furthermore, it should be noted  
221 that participants were not persons known to be at the EOL themselves.



## 222 Results

### 223 Translation and adaptation of the DLI-S

224 Minor changes were made to item content to ensure conceptual equivalence to the original items  
225 and better adapt items to the Swedish context. Detailed examples of changes made at various stages  
226 of the item revision process during both translation/adaptation and validation phases are provided in  
227 S4 Table, using two DLI-S items as examples.

### 228 Phase 1. Validity based on content and response process

#### 229 1.1 Expert review

230 All ten individuals contacted agreed to participate, of whom seven were women. The qualitative  
231 data, e.g., potential concerns identified and suggestions for improvement, were addressed in  
232 discussions about item revision during consensus meetings with the research group, thereby  
233 informing the continued process of revising the DLI-S. Overall, the expert review identified words and  
234 terms that were awkward or unclear in Swedish and raised questions regarding content relevance in  
235 Sweden. To address these issues, minor changes to content were made for several items (see S4  
236 Table). I-CVI scores ranged between 0.837–0.987, indicating that each item was considered relevant  
237 for the DL construct. The full DLI-S demonstrated good content validity with an  $S-CVI_{Ave}=0.926$ . All CVI  
238 scores are presented in supplement table S5.

#### 239 1.2 Cognitive interviews

240 In total, ten people (seven women) participated in the cognitive interviews. Overall, the cognitive  
241 interviews showed that some items could raise memories of past experiences. Nevertheless, DLI-S  
242 content was generally acceptable to participants, i.e., not distressing, interesting, and with items of  
243 varying difficulty. Table 1 presents six types of issues requiring minor changes to the DLI-S and  
244 affected items and/or scales, based on participants' response processes, comments about the  
245 instrument, and suggestions for improvement (see S4 Table for more detailed examples of item

246 revision). For example, we found that participants' responses to the question in sub-scale *Talking*  
 247 *Support* (1.1), "how difficult or easy you would find the following [items]", indicated that the question  
 248 did not sufficiently prompt participants to think about their self-perceived competence or  
 249 preparedness for engaging in conversations about EOL issues when answering, as was intended.  
 250 Instead, they often mentioned a combination of values, perceived social taboos, or relation to the  
 251 conversation partner when thinking aloud about their responses to the items. Consequently, the  
 252 question was reformulated to "how prepared would you be to talk about the following [conversations  
 253 about EOL issues]?", to better guide respondents to consider their readiness to engage in  
 254 conversations about the EOL when answering items in this sub-scale.

255 **Table 1. Overview of issues identified in the cognitive interviews and how they were addressed.**

| Issue                                                                              | Affected items/<br>scales | Revisions to address issue                                                                                                                                                                                                       |
|------------------------------------------------------------------------------------|---------------------------|----------------------------------------------------------------------------------------------------------------------------------------------------------------------------------------------------------------------------------|
| Vague or ambiguous item statement                                                  | 4, 13, 14, 16,19, 24      | Items clarified to better reflect conceptual meaning and/or semantic precision                                                                                                                                                   |
| Double-barrelled item, e.g., item statement contains more than one behaviour/trait | 19                        | First section removed to make item statement more concise and focused on the trait in question                                                                                                                                   |
| Item relevance or applicability to Swedish context                                 | 14, 15, 20, Scale 4.1     | Examples provided clarify content (21); item wordings revised and refined (14, 15, 21). Question in scale 4.1 rephrased to better suit the Swedish context with universal health care                                            |
| Overlapping items (item content is perceived as repeating)                         | Scale 2                   | No change at this stage, all items retained as they are considered to contribute with different aspects on a theoretical level                                                                                                   |
| Unclear question format                                                            | Sub-scales 1.1 and 4.1    | Questions specified to better reflect intended use of the instrument; clarifying instructions added for the instrument to highlight that questions relate to individual perceptions and that there are no right or wrong answers |

|                                           |                        |                                                                                                                                                   |
|-------------------------------------------|------------------------|---------------------------------------------------------------------------------------------------------------------------------------------------|
| Unsuitable or unclear response categories | Sub-scales 1.1 and 1.2 | Response categories changed to better suit the scale question (from <i>very difficult/very easy</i> to <i>not prepared at all/very prepared</i> ) |
|-------------------------------------------|------------------------|---------------------------------------------------------------------------------------------------------------------------------------------------|

256

257 [1.3 Literacy review](#)

258 The first review found that 84.7% of the words used in the DLI-S were among the 5,000 most  
 259 common in Swedish. The consultant suggested more common or easy-to-read alternatives to difficult  
 260 or uncommon terms, which formed the basis for another round of item revision through consensus  
 261 meetings in the research group. This revised DLI-S version was then used in the five subsequent  
 262 cognitive interviews. A second literacy review was conducted on the final DLI-S, in which the rate had  
 263 increased to 93.3%, which was deemed sufficient.

264 [Phase 2. Validity based on internal structure](#)

265 In total, 503 people completed the survey, giving a response rate of 17%. At the retest, 55  
 266 participants completed the survey, giving a second response rate of 67%. Socio-demographic  
 267 characteristics of participants are presented in Table 2. Since the online survey used a mandatory  
 268 response procedure, requiring all items to be answered to proceed, there were no missing values in  
 269 the data. Item-level descriptives are presented in Table 3. Inter-item correlations within sub-scales  
 270 were generally high, e.g. >0.5, and presented in supplement table S6.

271

272 **Table 2. Sample characteristics of participants in Phase 2 (n=503)**

| <b>Socio-demographic characteristics</b>            | <b>Mean (SD)</b> | <b>Range</b>      |
|-----------------------------------------------------|------------------|-------------------|
| Age                                                 | 49.95 (17.92)    | 18-86             |
|                                                     | <b>Count</b>     | <b>Percentage</b> |
| <b>Gender</b>                                       |                  |                   |
| Male                                                | 253              | 50.4%             |
| Female                                              | 246              | 49.0%             |
| Other (Non-binary or trans)                         | 3                | 0.6%              |
| <b>Highest level of completed education</b>         |                  |                   |
| Lower secondary education or less                   | 42               | 8.3%              |
| Upper secondary education                           | 207              | 41.2%             |
| Post-secondary education                            | 24               | 4.8%              |
| Higher general or vocational education diploma      | 77               | 15.3%             |
| Higher education, bachelor's degree or equivalent   | 89               | 17.7%             |
| Higher education, master's degree or more           | 64               | 12.7%             |
| <b>Origin</b>                                       |                  |                   |
| Sweden                                              | 467              | 92.8%             |
| Europe, excl. Sweden                                | 26               | 5.2%              |
| Outside Europe                                      | 10               | 2.0%              |
| <b>Work or volunteering experience</b>              |                  |                   |
| EOL care provision (work / volunteer)               | 71 / 28          | 14% / 5.6%        |
| Grief support (work / volunteer)                    | 49 / 32          | 9.9% / 6.2%       |
| <b>Professional experience in care</b>              |                  |                   |
| Care sector                                         | 60               | 11.9%             |
| Social care sector                                  | 39               | 7.8%              |
| Both care and social care                           | 12               | 2.4%              |
| No professional experience                          | 392              | 77.9%             |
| <b>EOL experiences <sup>a</sup></b>                 |                  |                   |
| Death of a family member, close relative, or friend | 408              | 81.2%             |
| Own life-threatening illness                        | 45               | 9.0%              |
| Supporting a person with a life-threatening illness | 113              | 22.4%             |
| Care for a relative at the EOL                      | 64               | 12.8%             |
| Providing EOL care professionally                   | 55               | 10.9%             |
| No EOL experience                                   | 29               | 5.8%              |

273 Notes: EOL=end-of-life; <sup>a</sup> Multiple responses allowed, sum≠503

274

275

276

277

278

279 **Table 3. Descriptive statistics for the DLI-S items\* (n=503).**

| Items                                                                                                                                        | Mean | SD   | Corrected item-total correlation |
|----------------------------------------------------------------------------------------------------------------------------------------------|------|------|----------------------------------|
| 1. Talk about dying, death, or grief with a close friend                                                                                     | 3.91 | 1.04 | .43                              |
| 2. Talk about dying, death, or grief with a child                                                                                            | 2.98 | 1.27 | .40                              |
| 3. Talk with a bereaved person about their loss                                                                                              | 3.58 | 1.11 | .53                              |
| 4. Talk with care staff about support for a person who will die at home or in their place of care                                            | 3.66 | 1.12 | .61                              |
| 5. Feed or help someone to eat                                                                                                               | 3.75 | 1.21 | .51                              |
| 6. Wash someone                                                                                                                              | 3.09 | 1.39 | .55                              |
| 7. Lift someone or help to move them                                                                                                         | 3.64 | 1.27 | .38                              |
| 8. Administer injections                                                                                                                     | 2.55 | 1.51 | .46                              |
| 9. Made me more emotionally prepared to support others with processes related to death and dying                                             | 3.56 | 1.06 | .57                              |
| 10. Made me think about what is important and not important in life                                                                          | 3.98 | 0.99 | .43                              |
| 11. Made me wiser and given me new understanding                                                                                             | 3.70 | 0.96 | .49                              |
| 12. Increased my compassion toward myself                                                                                                    | 3.38 | 1.05 | .38                              |
| 13. Made me better prepared to face similar challenges in the future                                                                         | 3.60 | 1.02 | .58                              |
| 14. I know about rules and regulations regarding deaths at home                                                                              | 2.12 | 1.18 | .66                              |
| 15. I know that there are documents that can help a person plan before death                                                                 | 3.28 | 1.38 | .47                              |
| 16. I know enough about how [the health and social care systems] operate to be able to support a person in receiving care at the end of life | 2.60 | 1.29 | .75                              |
| 17. I know about processes for funerals, where I can turn, and which choices are available                                                   | 3.26 | 1.31 | .58                              |
| 18. I know how to access palliative care in the area where I live                                                                            | 2.27 | 1.33 | .69                              |
| 19. I know enough to make decisions about medical treatments and understand how they may affect quality of life, at the end of life          | 2.53 | 1.33 | .70                              |
| 20. I am aware of different ways that cemetery staff can be of help around funerals                                                          | 2.67 | 1.25 | .64                              |
| 21. To get support in the area where I live, e.g., from clubs, associations, or volunteer organizations                                      | 2.12 | 1.16 | .68                              |
| 22. To get help with providing day to day care for a person at the end of life                                                               | 2.48 | 1.31 | .74                              |
| 23. To get equipment that are required for care                                                                                              | 2.69 | 1.36 | .69                              |
| 24. To get support that is culturally appropriate for a person                                                                               | 2.06 | 1.15 | .63                              |
| 25. To get emotional support for myself                                                                                                      | 2.46 | 1.25 | .72                              |
| 26. People with diseases that might lead to death                                                                                            | 2.83 | 1.28 | .66                              |
| 27. People who are nearing the end of their lives                                                                                            | 2.61 | 1.28 | .70                              |
| 28. People who are caring for someone who is dying                                                                                           | 2.50 | 1.29 | .72                              |
| 29. People who are grieving                                                                                                                  | 2.86 | 1.32 | .64                              |

280 \* DLI-S items translated to English

281 Reliability

282 The DLI-S demonstrated high internal consistency reliability, Cronbach’s  $\alpha=0.94$  for the overall scale  
 283 and between 0.81–0.93 for the sub-scales. Test-retest reliability was moderate to good, with scale-  
 284 level ICC ranging 0.66–0.84. Reliability estimates for the full DLI-S and each sub-scale are presented in  
 285 Table 4.

286 Confirmatory factor analysis

287 Fit indicators for all tested models are presented in Table 5. The one-factor model was tested first,  
 288 demonstrating adequate fit. The four-factor model, corresponding to the main dimensions of DL,  
 289 generated a better fit, though still not meeting all recommended thresholds. The six-factor model  
 290 showed good fit, performing best of the three models tested. As illustrated in Figure 2, factor  
 291 loadings in this model were generally high, ranging between 0.57–0.95, and correlations between  
 292 factors were moderate to strong, between 0.43–0.86.

293 **Table 4. Descriptive statistics and reliability estimates for the full DLI-S and each sub-scale.**

|                          | Mean score<br>(SD) <sup>a</sup> | Floor/ceiling<br>effect (%) | Cronbach's $\alpha$<br>(95% CI) <sup>b</sup> | AIC <sup>b</sup> | ICC (95% CI) <sup>c</sup> |
|--------------------------|---------------------------------|-----------------------------|----------------------------------------------|------------------|---------------------------|
| DLI-S (full scale)       | 5.15 (1.86)                     | 0.2/0.6                     | 0.94 (0.94-0.95)                             | 0.36             | 0.85 (0.76-0.91)          |
| Talking support          | 6.28 (2.28)                     | 0.8/8.9                     | 0.82 (0.78-0.84)                             | 0.52             | 0.68 (0.50-0.80)          |
| Hands-on care            | 5.63 (2.69)                     | 1.6/10.3                    | 0.81 (0.78-0.84)                             | 0.53             | 0.81 (0.69-0.88)          |
| Learning from experience | 6.59 (2.05)                     | 0.2/8.7                     | 0.83 (0.84-0.88)                             | 0.56             | 0.66 (0.49-0.79)          |
| Factual knowledge        | 4.13 (2.49)                     | 3.2/2.0                     | 0.89 (0.87-0.90)                             | 0.53             | 0.84 (0.73-0.90)          |
| Accessing help           | 3.34 (2.71)                     | 18.5/2.0                    | 0.92 (0.91-0.93)                             | 0.69             | 0.72 (0.57-0.83)          |
| Community support groups | 4.21 (2.89)                     | 13.1/6.2                    | 0.92 (0.91-0.93)                             | 0.74             | 0.67 (0.50-0.79)          |

294 Notes: <sup>a</sup>Mean scores are transformed to a range from 0-10; <sup>b</sup> $n=503$ ; AIC=Average inter-item correlation; ICC=  
 295 Intra-class correlation; <sup>c</sup> $n=55$

298 **Table 5. Fit indicators of tested factor models of death literacy ( $n=503$ ).**

| Tested model (Estimator DWLS) | CFI   | TLI   | RMSEA (CI)          | SRMR  | $\chi^2/df$     |
|-------------------------------|-------|-------|---------------------|-------|-----------------|
| One factor                    | 0.933 | 0.928 | 0.200 (0.196-0.204) | 0.139 | 7966.767/377*** |
| Four factors                  | 0.980 | 0.978 | 0.110 (0.106-0.114) | 0.081 | 2629.432/371*** |
| Six factors                   | 0.993 | 0.993 | 0.064 (0.060-0.068) | 0.054 | 1107.631/362*** |

299 Notes: DLWS=Diagonal weighted least squares; TLI=Tucker-Lewis Index, CFI=Comparative Fit Index  
 300 \*\*\* $p < 0.001$

301 **Fig 2. Path diagram of the best-fitting model, demonstrating standardized factor loadings for items**  
302 **and correlations between factors.**

303        ↗ Factor loadings  
304        ◻ Correlation coefficients between factors

305

306 **Scale descripti** 

307 Scale descriptives, i.e., mean scores, standard deviations, and floor and/or ceiling effects, are

308 presented in Table 4. Total DLI scores and sub-scale scores were normally distributed in the sample,

309 with the exception of the sub-scale *Accessing help*, which demonstrated a floor effect, i.e., a

310 negatively skewed distribution.

## 311 Discussion

312 This mixed-methods study is, to our knowledge, the first that has assessed the validity of the DLI in a

313 new language, outside its original Australian context. Using an iterative multi-step process of

314 translation, adaptation, and validation that generated both qualitative and quantitative data, we

315 performed a comprehensive assessment of several sources of validity evidence for the DLI-S in a new

316 context with regard to culture, language, and care organization and provision. The results found

317 evidence of cross-cultural validity of the DLI and support for the proposed six-factor model of DL.

318 Both I-CVI and S-CVI ratings exceed the recommended minimum set out by Polit, Beck (16),

319 suggesting support for DLI-S' validity in terms of item clarity and relevance for the DL construct.

320 Despite high CVI ratings, several potential issues were raised by experts regarding item meaning and

321 suitability in a Swedish context, highlighting the need for qualitative data to make meaningful

322 assessments of content validity for translated instruments. Likewise, qualitative findings from the

323 cognitive interviews were instrumental for guiding the researchers in addressing problematic items

324 and unclear instructions. The cognitive interviews showed that the DLI-S could be completed by

325 people with varying EOL experiences, from those with who describe themselves as having very

326 limited EOL experiences to experts in the field. Importantly, the cognitive interviews also

327 demonstrated that the DLI-S was not perceived as too sensitive or distressing, although it was noted  
328 that certain questions could bring up emotional memories. Several participants mentioned that they  
329 thought the items were interesting and thought-provoking, suggesting that completing the DLI-S  
330 could constitute a positive self-reflective experience. This is important since death education often  
331 emphasizes the role of reflection and sharing of experiences as part of the learning process [38]. In  
332 addition, the high proportion of survey participants who were willing to complete the survey a  
333 second time further illustrate DLI-S' acceptability. This is a significant finding since death is often  
334 described as a taboo topic in Sweden [39]. Still, as Arthur, Menon (40) state, cognitive interviews  
335 about instruments of a sensitive nature can be challenging: it may be difficult to raise concerns about  
336 intrusive or insensitive questions in a face-to-face situation, where a participant might feel obliged to  
337 justify their opinion.

338 One challenge regarding content validity concerns the definition of "community" used in item 21  
339 (*Assessing help*). There is no Swedish word for "community", which could be translated with an  
340 emphasis on either social, geographical, or cultural connotations. To guide the translation process,  
341 the Swedish research team discussed the intention of the term with the original DLI developers.  
342 Based on this discussion, we used a translation that highlight location, i.e., neighborhood. Even if this  
343 is a common interpretation of the term and no major problems were identified during the cognitive  
344 interviews, it is possible that this translation was too narrow and influenced how the question  
345 functioned in the Swedish setting, as it is more specific than the English term.

346 The DLI-S was found to have satisfactory psychometric properties, with support for validity evidence  
347 based on internal structure. However, the findings also identify some potential issues with the DLI-S  
348 that are important to consider. High Cronbach's  $\alpha$  for all scales and sub-scales indicate that items are  
349 inter-related but does not necessarily mean that the scale is unidimensional [29]. Scale-level AICs  
350 further confirm strong item inter-relatedness, with values exceeding the recommended range. This  
351 finding raises questions of item redundancy, i.e., presence of items that do not sufficiently contribute



352 with new information to measure the construct. The inter-item correlations suggest that the DLI-S  
353 might benefit from having one or several items removed: in particular the sub-scales comprising the  
354 dimensional scale *Community capacity* (*Accessing help* and *Community support groups*). These sub-  
355 scales consistently performed worse in comparison to the other scales and the instrument overall.  
356 For example, the floor effect in *Accessing help* indicates that the sub-scale has limited ability  
357 differentiating between responses at low levels, which might reduce reliability [41]. This finding also  
358 points to differences between the Swedish and Australian context that appear as variation in item  
359 difficulty for these items [42]. In addition, the confirmatory factor analysis showed that two factors  
360 (*Existing knowledge* and *Accessing help*) were highly correlated, suggesting that items in these scales  
361 may measure one, underlying, factor rather than two distinct dimensions of DL. Further studies are  
362 thus warranted to explore the performance of a shorter DLI-S version in the Swedish context and to  
363 investigate if a five-factor model constitutes a better fit for the DLI-S and the extent to which this  
364 might be relevant in other contexts.

365 In sum, the validity evidence for internal structure show that the DLI-S performs well  
366 psychometrically, although the comparatively worse performance of the *Community capacity* sub-  
367 scales may indicate difference in function or meaning in Sweden compared to Australia. This finding  
368 could be an accurate reflection of differences between the Swedish and Australian context,  
369 particularly in how care systems are organized and people's expectations of and interactions with  
370 them. In Sweden, public awareness of palliative and EOL care has been found to be generally low  
371 [39]. Unlike many other countries, Swedish EOL care is not dependent on public involvement such as  
372 volunteerism and charitable donations [43, 44]. Instead, Sweden has a long history of tax-funded  
373 universal welfare and high levels of trust in health care providers and institutions [45], which has  
374 remained stable even during the Covid-19 pandemic [46]. Indeed, participants in the cognitive  
375 interviews who gave low ratings for items in these sub-scales described feeling confident in their  
376 belief that if needed, they could turn to their primary care clinic for support or contact the national

377 hub for information about health and healthcare services in Sweden that is accessible round-the-  
378 clock by phone or chat.

### 379 Methodological discussion

380 There are several methodological limitations that should be acknowledged. Participants in the online  
381 survey comprise a non-probability quota sample that was recruited from an existing national panel.  
382 Although the composition is balanced to that of the Swedish population in terms of age, gender, and  
383 place of residence; the sample is slightly positively skewed compared to the population average [47]  
384 and underrepresented concerning place of birth, as 19.7% of the Swedish population are born  
385 outside Sweden, compared to only 7.2% of our participants [48]. More importantly, non-probability  
386 sampling raises concerns of possible self-selection and disproportion in unmeasured characteristics  
387 that may produce biased results, particularly if the purpose is making population estimates and  
388 representativeness [49, 50]. However, as theoretical rather than statistical generalization was the  
389 aim of this validation study, a representative and random sample was not required. Similarly, our  
390 17% response rate may be considered low, but a high response rate is not necessary for the purpose  
391 of validating an instrument. Still, additional studies using larger and representative samples may  
392 allow further examination of the generalizability of the DLI-S' validity in the Swedish population. In  
393 addition, it was not possible to examine convergent validity in relation to other instruments in this  
394 study since Swedish translations of other validated instruments measuring comparable constructs  
395 are lacking.

396 Despite these limitations, the study complied with gold standard practice for instrument translation,  
397 cultural adaptation, and validation, applying a rigorous process to assess validity and reliability  
398 evidence. It should be highlighted that since the aim of the study was to assess the validity of the DLI-  
399 S and not to develop a modified DLI version, no items were removed even if there were some  
400 indications of items that could be challenging in terms of comprehensibility (in phase 1) or may be  
401 redundant for measuring a DL dimension (in phase 2). Using bilingual field researchers instead of a

402 professional translator during forward translation can be considered a strength, as proposed by  
403 Nolte et al. [51] who point out that professional translators often focus on the accuracy of the  
404 linguistic translation rather than general readability and conceptual meaning. We also made efforts  
405 to address previously identified issues of transparency in validation, e.g., providing full instructions  
406 for the expert panel review (S3 File) to increase clarity regarding the basis of ratings [15]. An  
407 additional strength in this study is the use of literacy reviews, which is imperative for identifying  
408 possible unfair and unintended advantages or disadvantages to certain groups in the target  
409 population that might otherwise affect an instrument's usefulness [52].

## 410 Implications

411 Rather than a measure of knowledge and skills alone, DL seems to represent a more overarching  
412 familiarity with the dying process, as recently suggested by Hayes et al. [53], that also encompasses  
413 attitudes and self-efficacy. This perspective seems fitting in the Swedish context, as our findings  
414 suggest that alongside gauging the extent of knowledge gained from prior EOL experiences, the DLI  
415 appears to capture perceived capacity to handle EOL-related issues and confidence in abilities to  
416 learn. The demonstrated acceptability and good psychometric properties of the DLI-S suggest that it  
417 has potential to be used as an instrument to measure DL on national and local levels in Sweden.  
418 Nevertheless, more research is needed to better understand the DL construct, particularly across  
419 cultures. Furthermore, the suitability of the DLI as an evaluation tool for EOL-related educational  
420 initiatives, both within and outside formal care settings, needs to be examined in Sweden and  
421 elsewhere.

422 Lack of public awareness of EOL care and civic preparedness for engaging with issues related to death  
423 and dying has been identified as hindering people's access to high-quality care [54]. Internationally,  
424 there is a growth of community based EOL interventions, such as compassionate communities, which  
425 are intended to encourage people to assist and support those at the EOL within their community.  
426 With further validation, the DLI has potential to be a multifaceted instrument appropriate for

427 continued cross-cultural research and better understanding of impact of such initiatives [55]. This is  
428 increasingly pertinent as it is expected that EOL care provision will progressively take place outside  
429 formal care settings, e.g., aging populations, both internationally [56, 57] and in Sweden [58].  
430 Additional research can also shed light on whether the DLI may be useful in the care context to  
431 measure overarching competence for EOL care among staff, especially to evaluate more integrated  
432 and comprehensive EOL education interventions [59, 60].

## 433 Conclusion

434 This study provides empirical evidence supporting the validity of the Swedish translation and  
435 adaptation of the 29-item DLI to measure death literacy in the adult general public. The DLI-S was  
436 shown to be acceptable and feasible to answer regardless of the extent of respondents' prior EOL  
437 experiences. In a time with growing interest in building community preparedness for EOL issues, the  
438 DLI-S constitutes a promising instrument with good properties to measure overall capacity to engage  
439 with EOL care. Even though the six-factor model of the DLI yielded a good fit, our results show some  
440 characteristics that could potentially impact its measurement properties in a Swedish context.

441 **Acknowledgements**

442 The authors would like to acknowledge the generous contributions by Aleksandra Sjöström-Bujacz,  
443 Leo Kowalski, and Sara Runesdotter to the statistical analyses. We also acknowledge the contribution  
444 of Terese Stenfors during the translation of the DLI-S.

## 445 References

- 446 1. Kindig DA, Panzer AM, Nielsen-Bohlman L. Health literacy: a prescription to end  
447 confusion. In: *Medicine 10*, editor. Washington DC: The National Academies Press; 2004.
- 448 2. Leonard R, Noonan K, Horsfall D, Kelly M, Rosenberg JP, Grindrod A, et al. Developing a  
449 death literacy index. *Death Stud.* 2021;1-13. doi: 10.1080/07481187.2021.1894268.
- 450 3. Sallnow L, Tishelman C, Lindqvist O, Richardson H, Cohen J. Research in public health  
451 and end-of-life care – Building on the past and developing the new. *Prog Palliat Care.* 2016;24(1):25-  
452 30. doi: 10.1080/09699260.2015.1101260.
- 453 4. Noonan K, Horsfall D, Leonard R, Rosenberg J. Developing death literacy. *Prog Palliat*  
454 *Care.* 2016;24(1):31-5. doi: 10.1080/09699260.2015.1103498.
- 455 5. Horsfall D, Noonan K, Leonard R. Bringing our dying home: How caring for someone at  
456 end of life builds social capital and develops compassionate communities. *Health Sociology Review.*  
457 2012;21(4):373-82. doi: 10.5172/hesr.2012.21.4.373.
- 458 6. Leonard R, Noonan K, Horsfall D, Psychogios H, Kelly M, Rosenberg J, et al. *Death*  
459 *Literacy Index: A Report on its Development and Implementation.* Sydney: Western Sydney  
460 University; 2020.
- 461 7. Beaton DE, Bombardier C, Guillemin F, Ferraz MB. Guidelines for the process of cross-  
462 cultural adaptation of self-report measures. *Spine.* 2000;25(24):3186-91.
- 463 8. McGreevy J, Orrevall Y, Belqaid K, Bernhardson BM. Reflections on the process of  
464 translation and cultural adaptation of an instrument to investigate taste and smell changes in adults  
465 with cancer. *Scand J Caring Sci.* 2014;28(1):204-11. Epub 2013/02/07. doi: 10.1111/scs.12026.  
466 PubMed PMID: 23383751.
- 467 9. Beck CT, Bernal H, Froman RD. Methods to document semantic equivalence of a  
468 translated scale. *Research in Nursing & Health.* 2003;26(1):64-73.
- 469 10. Geisinger KF. Cross-cultural normative assessment: translation and adaptation issues  
470 influencing the normative interpretation of assessment instruments. *Psychol Assess.* 1994;6(4):304-  
471 12.
- 472 11. American Educational Research Association, American Psychological Association,  
473 National Council on Measurement in Education. *Standards for educational and psychological testing.*  
474 Washington DC: American Educational Research Association; 2014.
- 475 12. Zumbo BD, Chan EK. Setting the stage for validity and validation in social, behavioral,  
476 and health sciences: Trends in validation practices. *Validity and validation in social, behavioral, and*  
477 *health sciences:* Springer; 2014.
- 478 13. Gjersing L, Caplehorn JR, Clausen T. Cross-cultural adaptation of research instruments:  
479 language, setting, time and statistical considerations. *BMC Med Res Methodol.* 2010;10(1):13. doi:  
480 10.1186/1471-2288-10-13.

- 481 14. Cook DA, Zendejas B, Hamstra SJ, Hatala R, Brydges R. What counts as validity  
482 evidence? Examples and prevalence in a systematic review of simulation-based assessment.  
483 *Advances in Health Sciences Education*. 2014;19(2):233-50.
- 484 15. Grant JS, Davis LL. Selection and use of content experts for instrument development.  
485 *Research in nursing & health*. 1997;20(3):269-74.
- 486 16. Polit DF, Beck CT, Owen SV. Is the CVI an acceptable indicator of content validity?  
487 Appraisal and recommendations. *Res Nurs Health*. 2007;30(4):459-67. Epub 2007/07/27. doi:  
488 10.1002/nur.20199. PubMed PMID: 17654487.
- 489 17. Polit DF, Beck CT. The content validity index: are you sure you know what's being  
490 reported? Critique and recommendations. *Research in nursing & health*. 2006;29(5):489-97.
- 491 18. Beatty PC, Willis GB. Research Synthesis: The Practice of Cognitive Interviewing. *Public*  
492 *Opin Q*. 2007;71(2):287-311. doi: 10.1093/poq/nfm006.
- 493 19. Fonteyn ME, Kuipers B, Grobe SJ. A Description of Think Aloud Method and Protocol  
494 Analysis. *Qual Health Res*. 1993;3(4):430-41. doi: 10.1177/104973239300300403.
- 495 20. Willis GB, Miller K. Cross-Cultural Cognitive Interviewing. *Field Methods*.  
496 2011;23(4):331-41. doi: 10.1177/1525822x11416092.
- 497 21. Willis GB. Analysis of the cognitive interview in questionnaire design: Oxford University  
498 Press; 2015.
- 499 22. Pasek J. When will Nonprobability Surveys Mirror Probability Surveys? Considering  
500 Types of Inference and Weighting Strategies as Criteria for Correspondence. *International Journal of*  
501 *Public Opinion Research*. 2016;28(2):269-91. doi: 10.1093/ijpor/edv016.
- 502 23. Mundfrom DJ, Shaw DG, Ke TL. Minimum Sample Size Recommendations for  
503 Conducting Factor Analyses. *International Journal of Testing*. 2005;5(2):159-68. doi:  
504 10.1207/s15327574ijt0502\_4.
- 505 24. Shoukri MM, Asyali M, Donner A. Sample size requirements for the design of reliability  
506 study: review and new results. *Statistical Methods in Medical Research*. 2004;13(4):251-71.
- 507 25. Polit DF. Getting serious about test-retest reliability: a critique of retest research and  
508 some recommendations. *Qual Life Res*. 2014;23(6):1713-20. Epub 2014/02/08. doi: 10.1007/s11136-  
509 014-0632-9. PubMed PMID: 24504622.
- 510 26. Rosseel Y. lavaan: An R Package for Structural Equation Modeling. *Journal of Statistical*  
511 *Software*. 2012;48(2):1-36.
- 512 27. McHorney CA, Tarlov AR. Individual-patient monitoring in clinical practice: are  
513 available health status surveys adequate? *Qual Life Res*. 1995;4(4):293-307. doi:  
514 10.1007/bf01593882.
- 515 28. Streiner DL, Norman GR, Cairney J. Health measurement scales: a practical guide to  
516 their development and use: Oxford University Press, USA; 2015.

- 517 29. Clark LA, Watson D. Constructing validity: New developments in creating objective  
518 measuring instruments. *Psychol Assess.* 2019;31(12):1412-27. Epub 2019/03/22. doi:  
519 10.1037/pas0000626. PubMed PMID: 30896212; PubMed Central PMCID: PMC6754793.
- 520 30. Sijtsma K. On the use, the misuse, and the very limited usefulness of Cronbach's alpha.  
521 *Psychometrika.* 2009;74(1):107.
- 522 31. Dima AL. Scale validation in applied health research: tutorial for a 6-step R-based  
523 psychometrics protocol. *Health Psychology and Behavioral Medicine.* 2018;6(1):136-61. doi:  
524 10.1080/21642850.2018.1472602.
- 525 32. Cortina JM. What is coefficient alpha? An examination of theory and applications. *J*  
526 *Appl Psychol.* 1993;78(1):98.
- 527 33. Koo TK, Li MY. A Guideline of Selecting and Reporting Intraclass Correlation  
528 Coefficients for Reliability Research. *J Chiropr Med.* 2016;15(2):155-63. doi:  
529 10.1016/j.jcm.2016.02.012.
- 530 34. Li C-H. Confirmatory factor analysis with ordinal data: Comparing robust maximum  
531 likelihood and diagonally weighted least squares. *Behav Res Methods.* 2016;48(3):936-49. doi:  
532 10.3758/s13428-015-0619-7.
- 533 35. Hu Lt, Bentler PM. Cutoff criteria for fit indexes in covariance structure analysis:  
534 Conventional criteria versus new alternatives. *Structural equation modeling: a multidisciplinary*  
535 *journal.* 1999;6(1):1-55.
- 536 36. Council for International Organizations of Medical Sciences. International ethical  
537 guidelines for biomedical research involving human subjects. *Bulletin of medical ethics.*  
538 2002;(182):17.
- 539 37. Labott SM, Johnson TP, Fendrich M, Feeny NC. Emotional risks to respondents in  
540 survey research: Some empirical evidence. *Journal of Empirical Research on Human Research Ethics.*  
541 2013;8(4):53-66.
- 542 38. McClatchey IS, King S. The Impact of Death Education on Fear of Death and Death  
543 Anxiety Among Human Services Students. *Omega (Westport).* 2015;71(4):343-61. Epub 2015/12/17.  
544 doi: 10.1177/0030222815572606. PubMed PMID: 26665963.
- 545 39. Westerlund C, Tishelman C, Benkel I, Furst CJ, Molander U, Rasmussen BH, et al. Public  
546 awareness of palliative care in Sweden. *Scand J Public Health.* 2018;46(4):478-87. Epub 2018/01/06.  
547 doi: 10.1177/1403494817751329. PubMed PMID: 29301481; PubMed Central PMCID:  
548 PMC67598249.
- 549 40. Arthur EK, Menon U, Browning K, Overcash J, Wills CE. Challenges of Cognitive  
550 Interviewing in Sensitive Health Topic Research. *Nurs Res.* 2021;70(5):376-82. Epub 2021/06/27. doi:  
551 10.1097/NNR.0000000000000530. PubMed PMID: 34173378.



- 552 41. Terwee CB, Bot SDM, De Boer MR, Van Der Windt DAWM, Knol DL, Dekker J, et al.  
553 Quality criteria were proposed for measurement properties of health status questionnaires. *J Clin*  
554 *Epidemiol.* 2007;60(1):34-42. doi: 10.1016/j.jclinepi.2006.03.012.
- 555 42. Reeve BB, Fayers P. Applying item response theory modeling for evaluating  
556 questionnaire item and scale properties. *Assessing quality of life in clinical trials: methods of practice.*  
557 2005;2:55-73.
- 558 43. Groeneveld EI, Cassel JB, Bausewein C, Csikós Á, Krajnik M, Ryan K, et al. Funding  
559 models in palliative care: Lessons from international experience. *Palliat Med.* 2017;31(4):296-305.  
560 doi: 10.1177/0269216316689015.
- 561 44. Lindqvist O, Tishelman C. Going public: reflections on developing the DöBra research  
562 program for health-promoting palliative care in Sweden. *Prog Palliat Care.* 2016;24(1):19-24. doi:  
563 10.1080/09699260.2015.1103497. PubMed PMID: WOS:000376256700006.
- 564 45. Mohseni M, Lindström M. Social capital, trust in the health-care system and self-rated  
565 health: The role of access to health care in a population-based study. *Soc Sci Med.* 2007;64(7):1373-  
566 83. doi: 10.1016/j.socscimed.2006.11.023.
- 567 46. Nielsen JH, Lindvall J. Trust in government in Sweden and Denmark during the COVID-  
568 19 epidemic. *West European Politics.* 2021:1-25.
- 569 47. Statistics Sweden. *Befolkningens utbildning 2020 [Educational attainment of the*  
570 *population 2020].* 2021.
- 571 48. Statistics Sweden. *Befolkningsstatistik i sammandrag 1960–2020 [A summary of*  
572 *population statistics 1960-2020].* 2021.
- 573 49. Mercer AW, Kreuter F, Keeter S, Stuart EA. Theory and practice in nonprobability  
574 surveys: parallels between causal inference and survey inference. *Public Opin Q.* 2017;81(S1):250-71.
- 575 50. Valliant R. Comparing alternatives for estimation from nonprobability samples. *Journal*  
576 *of Survey Statistics and Methodology.* 2020;8(2):231-63.
- 577 51. Nolte S, Osborne RH, Dwinger S, Elsworth GR, Conrad ML, Rose M, et al. German  
578 translation, cultural adaptation, and validation of the Health Literacy Questionnaire (HLQ). *PLoS One.*  
579 2017;12(2):e0172340. doi: 10.1371/journal.pone.0172340.
- 580 52. Han K, Colarelli SM, Weed NC. Methodological and statistical advances in the  
581 consideration of cultural diversity in assessment: A critical review of group classification and  
582 measurement invariance testing. *Psychol Assess.* 2019;31(12):1481.
- 583 53. Hayes B, Fabri AM, Coperchini M, Parkar R, Austin-Crowe Z. Health and death literacy  
584 and cultural diversity: insights from hospital-employed interpreters. *BMJ Support Palliat Care.*  
585 2020;10(1):e8. Epub 2017/07/06. doi: 10.1136/bmjspcare-2016-001225. PubMed PMID: 28676498.
- 586 54. Collins A, Brown JEH, Mills J, Philip J. The impact of public health palliative care  
587 interventions on health system outcomes: A systematic review. *Palliat Med.* 2020. doi:  
588 10.1177/0269216320981722.

- 589 55. Sallnow ES. Collective social capital: a study of new public health and end-of-life care.  
590 University of Edinburgh 2018.
- 591 56. Albers G, Pereira S, Onwuteaka-Philipsen B, Deliens L, Pasman R, Van den Block L.  
592 Chapter 1. A public health perspective on palliative care for older people: an introduction. In: Van  
593 den Block L, Albers G, Pereira S, Onwuteaka-Philipsen B, Pasman R, Deliens L, editors. Palliative care  
594 for older people: A public health perspective. Oxford: Oxford University Press; 2015. p. 3-15.
- 595 57. Bone AE, Gomes B, Etkind SN, Verne J, Murtagh FEM, Evans CJ, et al. What is the  
596 impact of population ageing on the future provision of end-of-life care? Population-based projections  
597 of place of death. *Palliat Med.* 2018;32(2):329-36. Epub 2017/10/11. doi:  
598 10.1177/0269216317734435. PubMed PMID: 29017018; PubMed Central PMCID: PMC5788077.
- 599 58. SOU. God och nära vård: En reform för ett hållbart hälso-och sjukvårdssystem (SOU  
600 2020:19) [Good and close care: A reform for a sustainable health care system]. Stockholm:  
601 Regeringskansliet, Stockholm, 2020.
- 602 59. Iida K, Ryan A, Hasson F, Payne S, McIlpatrick S. Palliative and end-of-life educational  
603 interventions for staff working in long-term care facilities: An integrative review of the literature. *Int J*  
604 *Older People Nurs.* 2021;16(1). doi: 10.1111/opn.12347.
- 605 60. Johansson T, Tishelman C, Cohen J, Eriksson LE, Goliath I. Continuums of change in a  
606 competence-building initiative addressing end-of-life communication in Swedish elder care. *Qual*  
607 *Health Res.* 2021;31(10):1904-17. doi: 10.1177/10497323211012986.
- 608
- 609

610 [Supporting information](#)

611 **S1 File. Original English-language Death Literacy Index, with scale and sub-scale headings**

612

613 **S2 File. Online survey, comprising the Swedish Death Literacy Index items and sociodemographic**  
614 **questions (in English).**

615

616 **S3 File. Instructions for expert panel review**

617

618 **S4 Table. Matrix with detailed examples of the revision process of two DLI-S items throughout**  
619 **instrument adaptation and validation.**

620 Notes: DLI-S items 4 and 19, which were found to be problematic in terms of clarity, relevance, and/or  
621 language, are presented in Swedish and English. Item revision is marked in bold, with reasoning presented in  
622 English.

623

624 **S5 Table. Ratings of relevance and clarity and calculated overall content validity index (CVI).**

625 Notes: \*Positive rating=number of experts rating the item 3 or 4 on a 4-point scale. I-CVI calculated as ( $n$  of  
626 raters rating 3 or 4/total  $n$  of raters). Scale-level CVI was calculated using average proportion of I-CVI values.

627

628 **S6 Table. Inter-item correlation matrix of DLI-S items.**

629 \*\*. Correlation is significant at the 0.01 level (2-tailed).

630 \*. Correlation is significant at the 0.05 level (2-tailed).

631

632

633

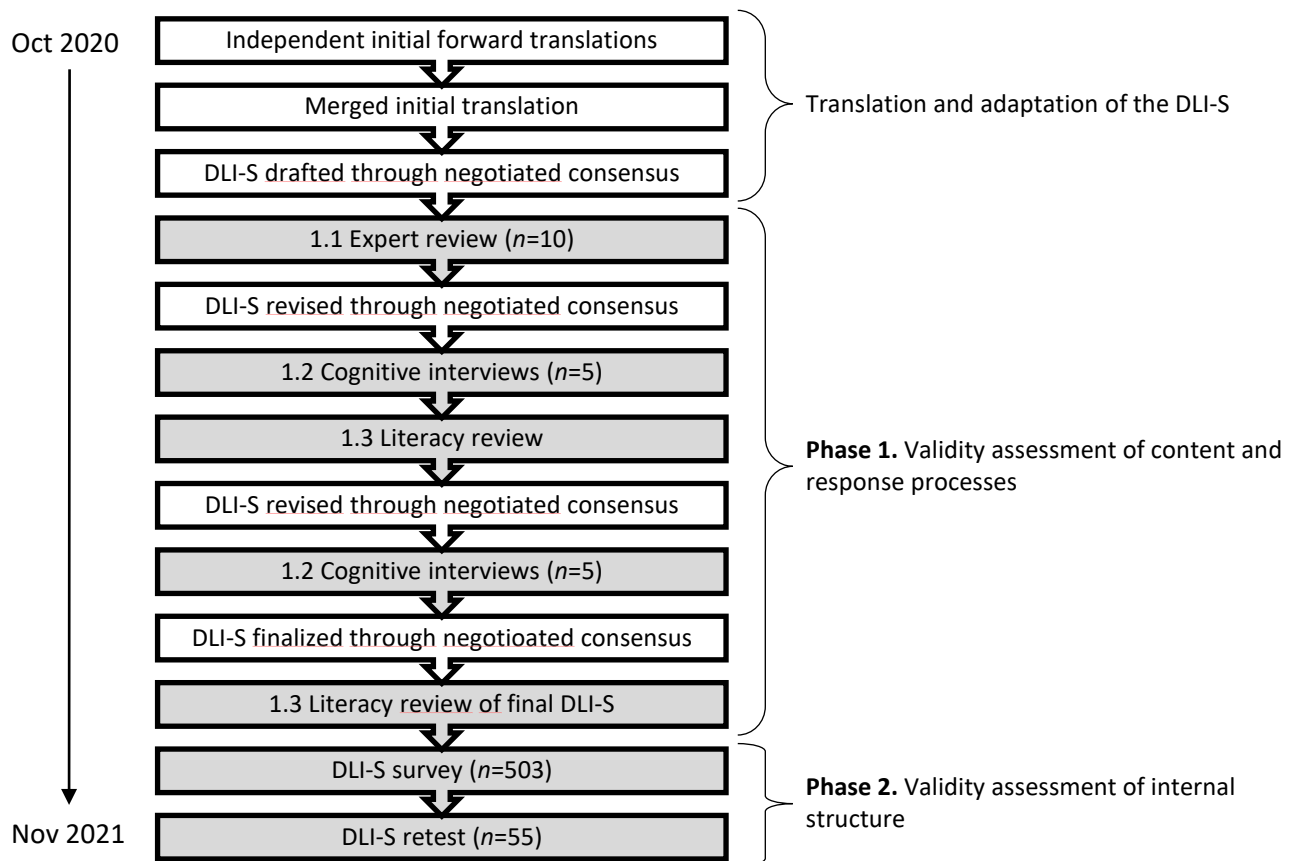

Figure 2

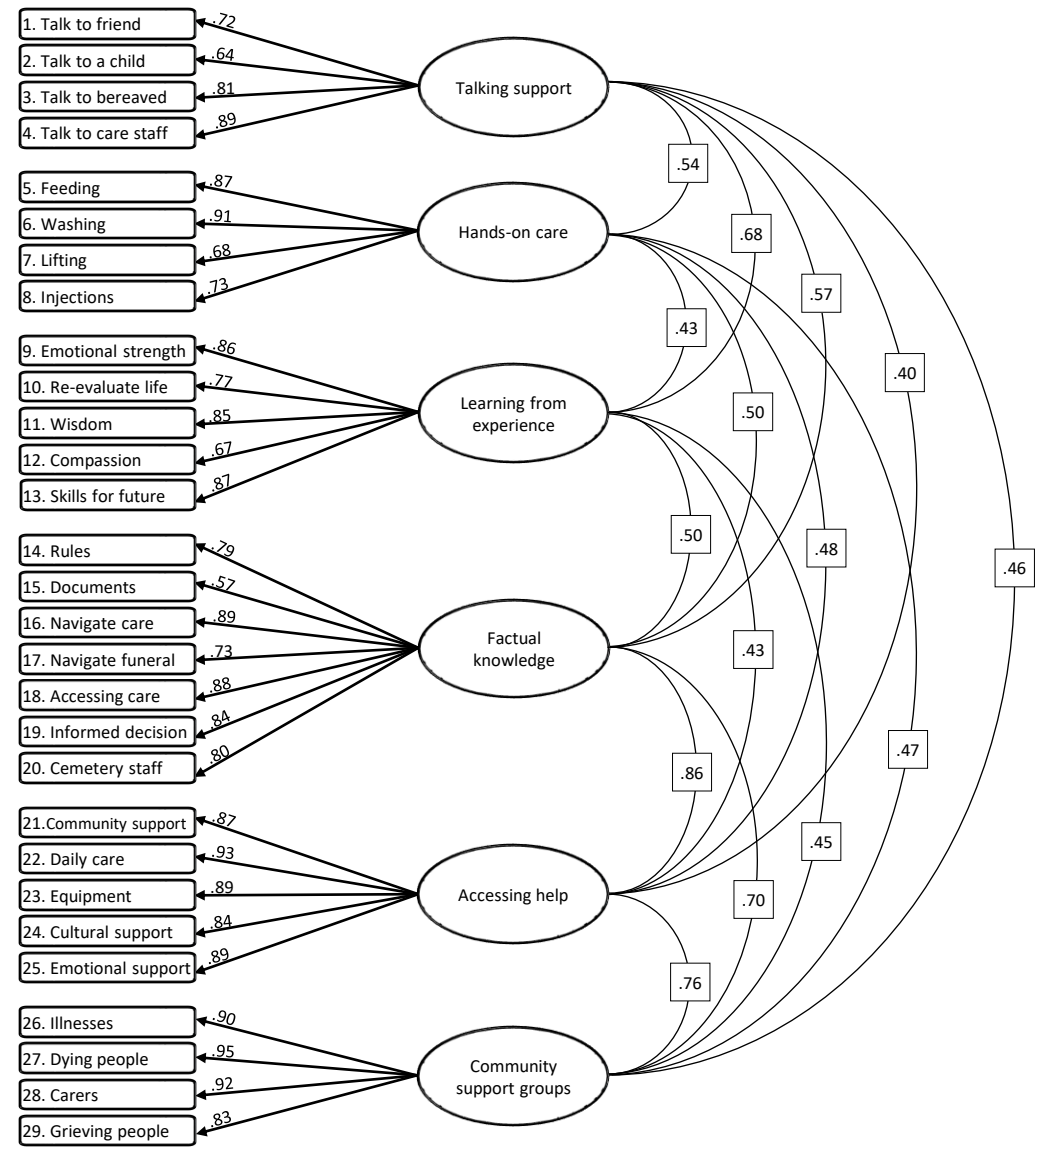

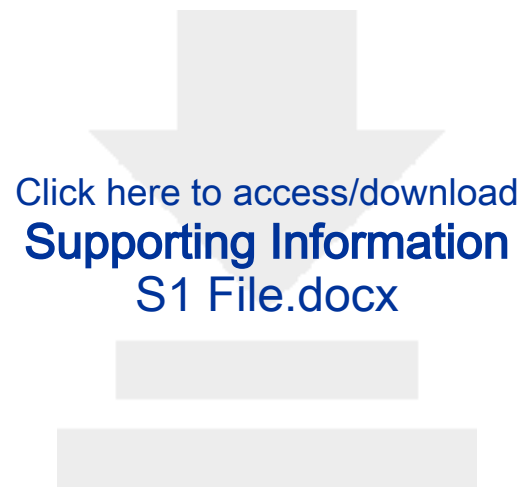

Click here to access/download  
**Supporting Information**  
S1 File.docx



Click here to access/download  
**Supporting Information**  
S2 File.docx



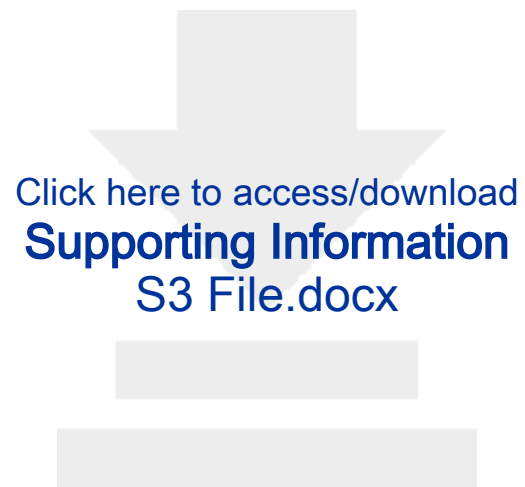





Click here to access/download  
**Supporting Information**  
S4 Table.docx





Click here to access/download  
**Supporting Information**  
S5 Table.docx





Click here to access/download  
**Supporting Information**  
S6 Table.pdf
